# Supplementary material
Source: PubMed Central journal article supplement (PMC6070035)
Supplement: kwy069_dickersonwebmaterialfinal.pdf [file kwy069_dickersonwebmaterialfinal.pdf]

**Web Table 1. Industry codes for the Danish job exposure matrix for diesel exhaust exposure**

| <b>Job Code</b> | <b>Job Title</b>                                           | <b>Industry Code</b> | <b>Industry</b>                             |
|-----------------|------------------------------------------------------------|----------------------|---------------------------------------------|
| 004             | Mechanical engineers                                       | 83241                | Consulting engineers                        |
| 234             | Service station attendants                                 | 62213                | Service stations                            |
| 490             | Miners and quarrymen                                       | 29010                | Gravel pits                                 |
|                 |                                                            | 29011                | Clay and gravel pits                        |
|                 |                                                            | 29012                | Stone fishers                               |
|                 |                                                            | 29013                | Limestone and chalk quarries                |
|                 |                                                            | 29020                | Extraction of minerals for fertilizer       |
|                 |                                                            | 29030                | Extraction of salt                          |
|                 |                                                            | 29090                | Other nonmetallic raw materials extraction  |
| 511             | Engine-room crew                                           | 71211                | Shipping companies                          |
|                 |                                                            | 71212                | Ferry operations                            |
| 530             | Railway engine and truck drivers, steam engine firemen     | 71110                | Railroads                                   |
|                 |                                                            | 71141                | Carrier businesses                          |
|                 |                                                            | 71142                | Moving businesses                           |
| 540             | Motor vehicle and tram drivers                             | 71132                | Taxi drivers                                |
|                 |                                                            | 71141                | Carrier businesses                          |
|                 |                                                            | 71142                | Moving businesses                           |
| 541             | Bicycle deliverers                                         | 71149                | Other transportation businesses             |
| 552             | Bus conductors                                             | 71121                | Bus operation                               |
|                 |                                                            | 71122                | Bus stations                                |
|                 |                                                            | 71131                | Sightseeing bus drivers                     |
| 560             | Harbor masters                                             | 71232                | Harbors                                     |
| 563             | Road transport supervisors                                 | 71133                | Taxi dispatchers                            |
|                 |                                                            | 71143                | Freight vehicle drivers                     |
| 652             | Machine and engine mechanics                               | 38210                | Manufacture of engines                      |
|                 |                                                            | 38220                | Manufacture of agricultural machine         |
|                 |                                                            | 38231                | Manufacture of machinery for wood-works     |
|                 |                                                            | 38232                | Manufacture of machinery for metal-works    |
|                 |                                                            | 38233                | Manufacture of foundry machinery            |
|                 |                                                            | 38241                | Manufacture of textile machinery            |
|                 |                                                            | 38242                | Manufacture of machinery and equipment      |
|                 |                                                            | 38243                | Manufacture of machinery for shoe-making    |
|                 |                                                            | 38249                | Manufacture of other industrial machinery   |
|                 |                                                            | 38251                | Manufactures of scales                      |
|                 |                                                            | 38252                | Manufactures of scales                      |
|                 |                                                            | 38280                | Forge- and machine repair workshops         |
|                 |                                                            | 38291                | Man. of institutional kitchen equip         |
|                 |                                                            | 38292                | Manufacture of stoves and cookers           |
|                 |                                                            | 38293                | Manufacture of other household machines     |
|                 |                                                            | 38294                | Manufacture of internal transport equipment |
|                 |                                                            | 38295                | Manufacture and repair of sewing machines   |
|                 |                                                            | 38296                | Manufacture of gearwheels                   |
|                 |                                                            | 38297                | Manufacture of machinery for drycleaners    |
|                 |                                                            | 38298                | Subcontracting factories manufacture        |
|                 |                                                            | 38299                | Manufacture of other machinery              |
|                 |                                                            | 38411                | Iron shipyards                              |
|                 |                                                            | 38413                | Marine engine manufacture                   |
|                 |                                                            | 38431                | Manufacture of automobiles                  |
| 694             | Asphalt workers                                            | 50123                | Paving experts                              |
| 698             | Assisting construction workers                             | 50121                | General contracting businesses              |
|                 |                                                            | 50140                | Building and carpentry firms                |
|                 |                                                            | 50199                | Other building activities                   |
| 773             | Stationary engine and machinery operators (not on vessels) | 11201                | Agricultural machinery stations             |
| 780             | Stevedores etc.                                            | 71233                | Loading and unloading contractors           |
| 801             | Policemen                                                  | 91020                | Police and the judicial system              |

## Web Appendix

In order to examine the utility of the Danish diesel exhaust (DE) job-exposure matrix (NOCCA-DANJEM, constructed by investigators in the Nordic Occupational Cancer Study), we conducted an analysis of DE exposure and chronic obstructive pulmonary disease (COPD) (defined by ICD-8 code 348.0 or ICD-10 code G12.2) by applying the JEM to a 1:4 age- and sex-matched analysis of COPD cases and controls among the ALS controls in our data. Results for associations between DE exposure and COPD were similar to previously reported associations, producing statistically significant increases in odds of COPD: adjusted odds ratio (aOR) = 1.12 (95% confidence interval (CI): 1.05, 1.19) for the lowest quartile of diesel exhaust exposure and aOR = 1.10 (95% CI: 1.03, 1.17) for the highest quartile of diesel exhaust exposure compared to no exposure (not displayed). ICD-8, *International Classification of Diseases, Eighth Revision*; ICD-10, *International Classification of Diseases, Tenth Revision*.
